# Supplementary material for: XT-type DNA hydrogels loaded with VEGF and NGF promote peripheral nerve regeneration via a biphasic release profile
Source: Royal Society of Chemistry journal article supplement (doi:10.1039/d1bm01377g), 2021-01-01
Supplement: d1bm01377g1.pdf [file d1bm01377g1.pdf]

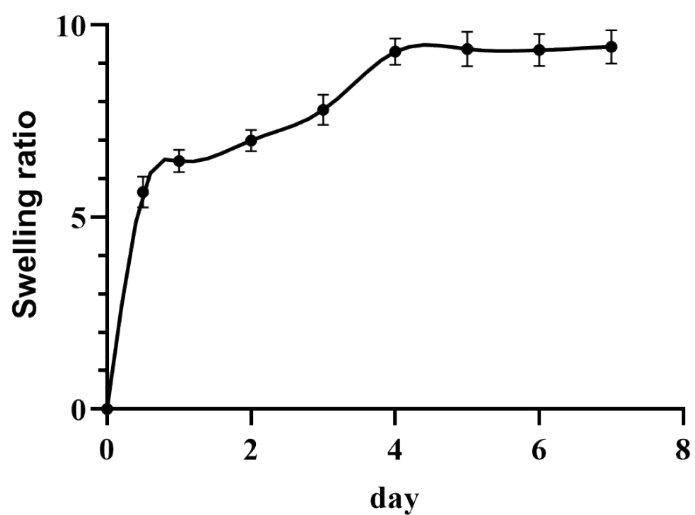

Figure S1. Swelling ratio of XT -type hydrogel.

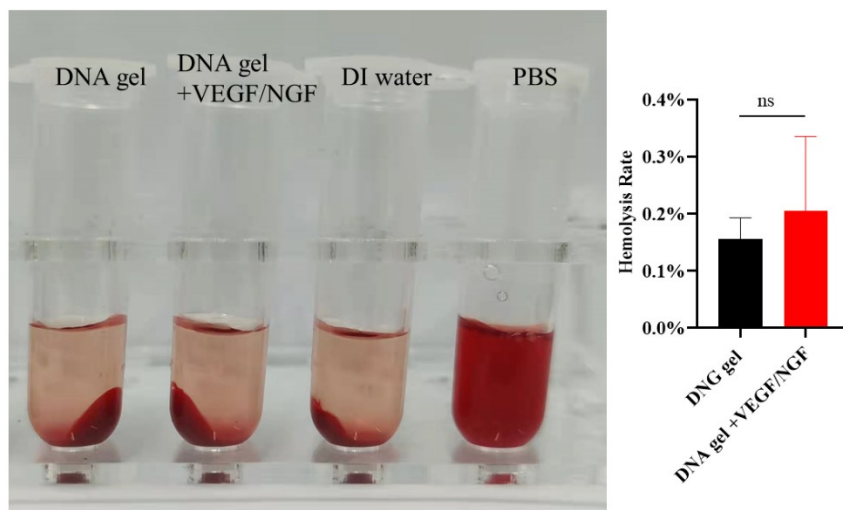

Figure S2. Hemolysis test of DNA gel and DNG gel + VEGF/NGF.
